# Supplementary material for: Predictive high-throughput screening of PEGylated lipids in oligonucleotide-loaded lipid nanoparticles for neuronal gene silencing
Source: Royal Society of Chemistry journal article supplement (doi:10.1039/d1na00712b), 2022-01-01
Supplement: d1na00712b1.pdf [file d1na00712b1.pdf]

## Supporting Information

### **Predictive high-throughput screening of PEGylated lipids in oligonucleotide-loaded lipid nanoparticles for neuronal gene silencing**

Apoorva Sarode<sup>1,\*</sup>, Yuchen Fan<sup>1,\*</sup>, Amy E. Byrnes<sup>2,\*</sup>, Michal Hammel<sup>3</sup>, Greg L. Hura<sup>3,4</sup>, Yige Fu<sup>1</sup>, Ponien Kou<sup>1</sup>, Chloe Hu<sup>1</sup>, Flora I. Hinz<sup>2</sup>, Jasmine Roberts<sup>2</sup>, Stefan G. Koenig<sup>1</sup>, Karthik Nagapudi<sup>1</sup>, Casper C. Hoogenraad<sup>2</sup>, Tao Chen<sup>1</sup>, Dennis Leung<sup>1</sup>, Chun-Wan Yen<sup>1,†</sup>

<sup>1</sup>Small Molecule Pharmaceutical Sciences, Genentech Inc., 1 DNA Way, South San Francisco, CA-94080, USA

<sup>2</sup>Department of Neuroscience, Genentech, Inc., South San Francisco, CA 94080, USA

<sup>3</sup>Molecular Biophysics and Integrated Bioimaging Division, Lawrence Berkeley National Lab, Berkeley, CA, USA

<sup>4</sup>Chemistry and Biochemistry Department, University of California Santa Cruz, Santa Cruz, CA, USA

\* These authors contributed equally to this work

† Corresponding author, Email: [yenc3@gene.com](mailto:yenc3@gene.com)

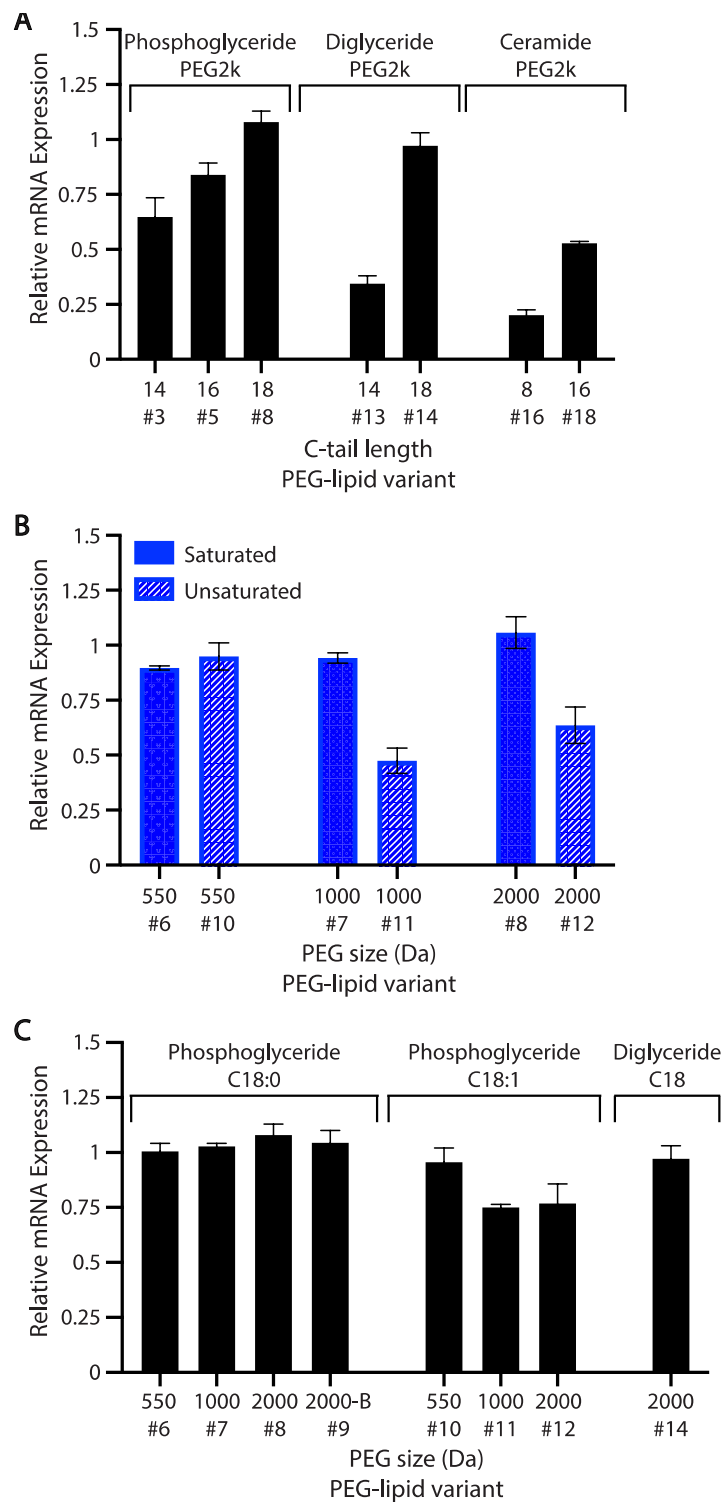

**Figure S1. PEG-lipid attributes differentially regulate *in vitro* ASO efficacy.** ASO-LNP formulations were prepared using (A) 5 mol% PEG-lipids with 2 kDa PEG, but different lengths of their hydrophobic carbon tails, (B) 3 mol% C-18 phosphoglyceride PEG-lipids containing saturated or unsaturated carbon tails, and (C) 5 mol% PEG-lipids with C-18 lipid tails, but varying sizes of their PEG chains. Results were replotted from the HTS data shown in **Figure 3** and are displayed relative to gymnosin.

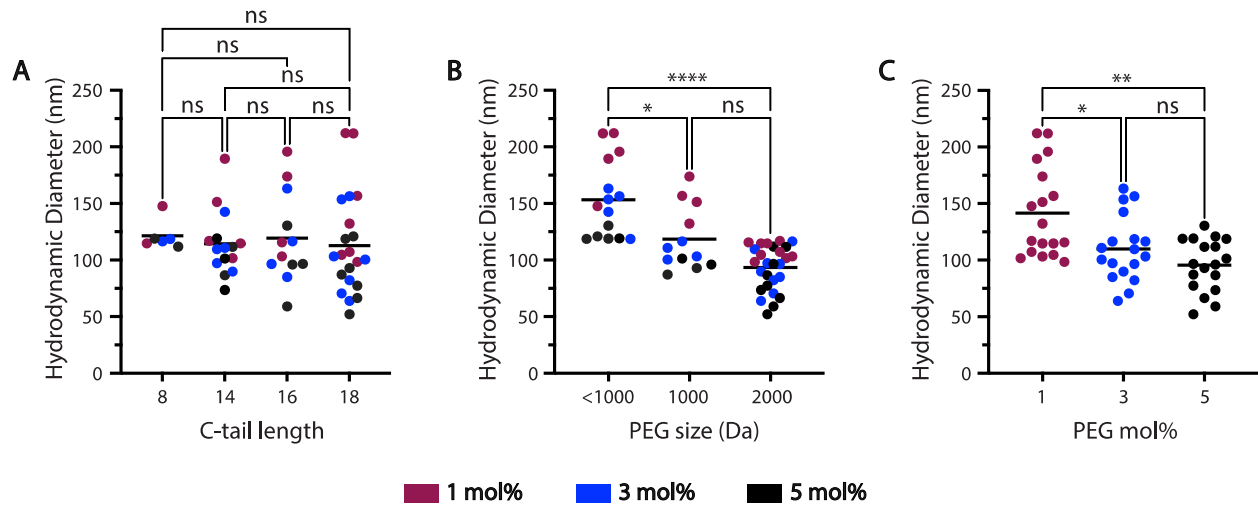

**Figure S2. PEG-lipid attributes differentially regulate ASO-LNP particle size.** DLS measurements for the ASO-LNP formulations were re-grouped based on (A) C-tail length, (B) PEG size, and (C) PEG-lipid molar ratio in LNPs to assess the significance of each parameter on the average hydrodynamic diameters of the LNPs. (Kruskal-Wallis test and Dunn's test, \* $p < 0.05$ , \*\* $p < 0.01$ , \*\*\*\* $p < 0.0001$ , ns: non-significant)

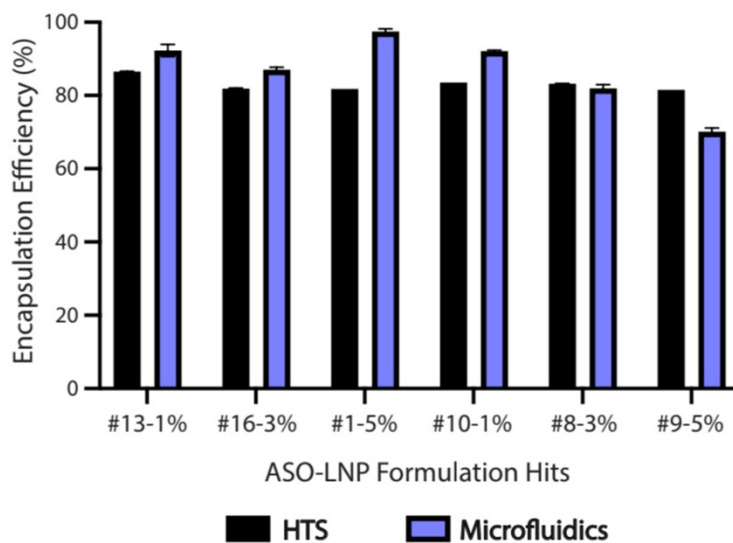

**Figure S3. Encapsulation efficiencies are comparable across ASO-LNP hit formulations.** Encapsulation efficiency was calculated based on total and free ASO amounts in each formulation, as determined using Oligreen assay and size exclusion chromatography, respectively.

## Section S1. Regression analysis on LNP particle sizes:

### A) Anionic PEG-lipids

- Linear Regression Model:

*ASO-LNP hydrodynamic diameter (nm) = 225.71 - 0.44\*carbon tail length(#C) - 0.05\*PEG size (Da) - 14.12\*PEG-lipid mol%*

- Coefficients:

|                    | <b>Coefficients</b> | <b>Standard Error</b> | <b>t Stat</b> | <b>p-value</b> |
|--------------------|---------------------|-----------------------|---------------|----------------|
| Intercept          | 225.7093718         | 26.01575913           | 8.67587106    | 6.4911E-10     |
| C-tail length (#C) | -0.445909286        | 1.509467593           | -0.2954083    | 0.76959034     |
| PEG size (Da)      | -0.047938375        | 0.004190871           | -11.438761    | 7.6631E-13     |
| PEG-lipid mol %    | -14.12145396        | 1.568862698           | -9.001077     | 2.788E-10      |

- Model summary:

R Square = 0.869, Adjusted R Square = 0.857, Standard Error = 15.37, Observations = 36  
ANOVA: Significance  $F = 3.16 \times 10^{-14}$

### B) Neutral PEG-lipids

- Linear Regression Model:

*ASO-LNP hydrodynamic diameter (nm) = 172.68 + 1.29\*carbon tail length(#C) - 0.03\*PEG size (Da) - 6.21\*PEG-lipid mol%*

- Coefficients:

|                    | <b>Coefficients</b> | <b>Standard Error</b> | <b>t Stat</b> | <b>p-value</b> |
|--------------------|---------------------|-----------------------|---------------|----------------|
| Intercept          | 172.6862673         | 17.81521134           | 9.693192182   | 1.3723E-07     |
| C-tail length (#C) | 1.294659428         | 1.101953097           | 1.174877072   | 0.25964028     |
| PEG size (Da)      | -0.031757849        | 0.006357037           | -4.99569956   | 1.9607E-04     |
| PEG-lipid mol %    | -6.209444167        | 2.271734507           | -2.733349407  | 1.6165E-02     |

- Model summary:

R Square = 0.700, Adjusted R Square = 0.636, Standard Error = 15.74, Observations = 18  
ANOVA: Significance  $F = 5.9 \times 10^{-4}$
